# Supplementary material for: Novel two-dimensional semiconductor SnP3: high stability, tunable bandgaps and high carrier mobility explored using first-principles calculations
Source: Royal Society of Chemistry journal article supplement (doi:10.1039/c8ta02494d), 2018-01-01
Supplement: c8ta02494d1.pdf [file c8ta02494d1.pdf]

**Electronic Supplementary Information for Novel two-dimensional  
semiconductor SnP<sub>3</sub>: high stability, tunable bandgaps and high  
carrier mobility explored by first-principles calculations**

Songsong Sun,<sup>a</sup>, Fanchen Meng,<sup>b</sup>, Hongyan Wang,<sup>a</sup>, Hui Wang,<sup>a</sup>, and Yuxiang Ni<sup>\*a</sup>

<sup>a</sup> *School of Physical Science and Technology,*

*Key Laboratory of Advanced Technology of Materials (Ministry of Education),*

*Southwest Jiaotong University, Chengdu 610031, China. and*

<sup>b</sup> *Department of Physics and Astronomy,*

*Clemson University, Clemson 29634, USA.*

## INTERLAYER INTERACTION IN THE $\text{SnP}_3$ MLTILAYER

In order to understand the intrinsic mechanism for the change from metal to semiconductor, two aspects need to be considered. Firstly, the structure of  $\text{SnP}_3$  can be described as a layer structure related to the As-type structure in which the corrugated layers are composed of puckered  $\text{P}_6$  rings as shown in Fig. 1. The layers thus formed are stacked upon one another perpendicular to the  $c$  axis so that a distorted octahedral environment of P atoms is formed around each of the Sn atoms, which results in significant puckering and a pseudo-Jahn-Teller distortion. We calculated the interlayer interaction from the multilayer to bilayer and the results (Figure. S1) illustrate that the interlayer interaction for  $\text{SnP}_3$  systems decreases from tetralayer to bilayer. Thus, we believe that the dependence of the interlayer interaction on the layer thickness most likely plays an important role in the metal to semiconductor transition in the  $\text{SnP}_3$  layered systems. Meanwhile, the quantum confinement effect may be another factor that affects the electronic structure transition. When the multilayer with metallic character reduced to semiconductive bilayer, the conduction bands shift towards the vacuum level.

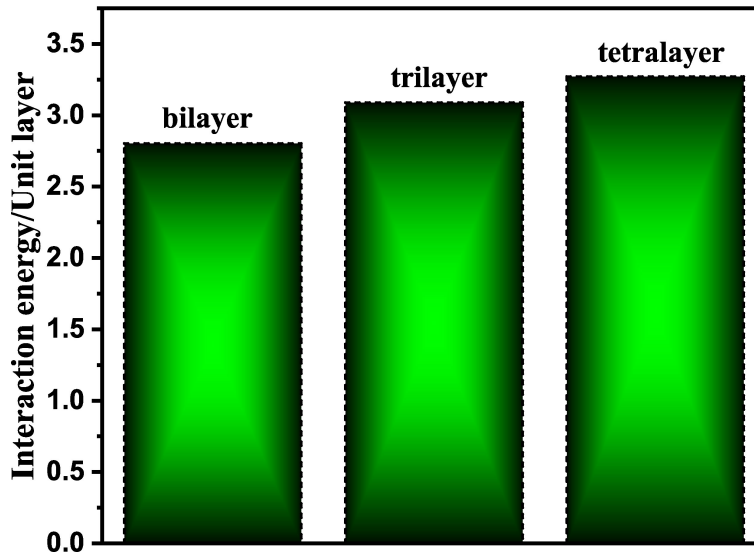

Figure S1. Interlayer interaction energies (eV) of  $\text{SnP}_3$  bilayer, trilayer, tetralayer.

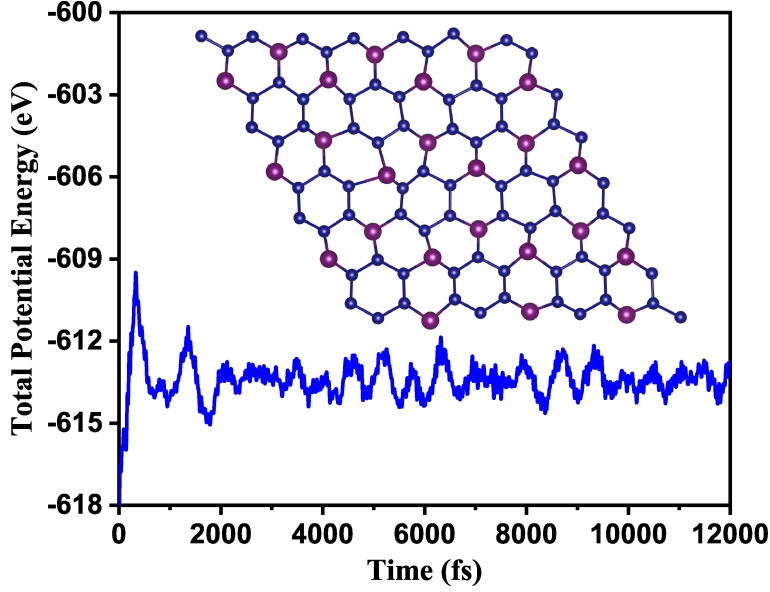

Figure S2. Total potential energy of SnP<sub>3</sub> monolayer during AIMD simulations at 300 K. The inset shows the snapshot at the end of simulation.

## THERMAL STABILITY

The thermal stability of SnP<sub>3</sub> monolayer is examined by performing AIMD simulations in the canonical ensemble. After evolving for 12 picoseconds (ps) at room temperature (300K) with a time step of 1 femtoseconds (fs), no structural reconstruction was observed at the end of the simulation (12 ps). The total potential energy is stabilized at around 2 ps, as shown in Fig. S2. The results suggest that the SnP<sub>3</sub> monolayer is thermally stable.

## THE RESPONSE OF MECHANICAL PROPERTIES OF SNP<sub>3</sub> MONOLAYER AND BILAYER TO THE ELASTIC STRAIN

When the applied strains are in the elastic range, the strain energy  $\Delta E$  has quadratic dependence on the value of applied strains  $\varepsilon$  (the strain energy is defined as the difference between the total energy of the system with strain  $E(\varepsilon)$  and that without strain  $E(0)$ ). Following the method based on first-principles calculations described in the previous work,[1, 2] we have investigated several strained structures and calculated the total energy of the corresponding fully relaxed structures, and found that the applied strains on SnP<sub>3</sub> monolayer (bilayer) in our manuscript, which are in the range from -6% to 12% ( -7% to 7%), are in

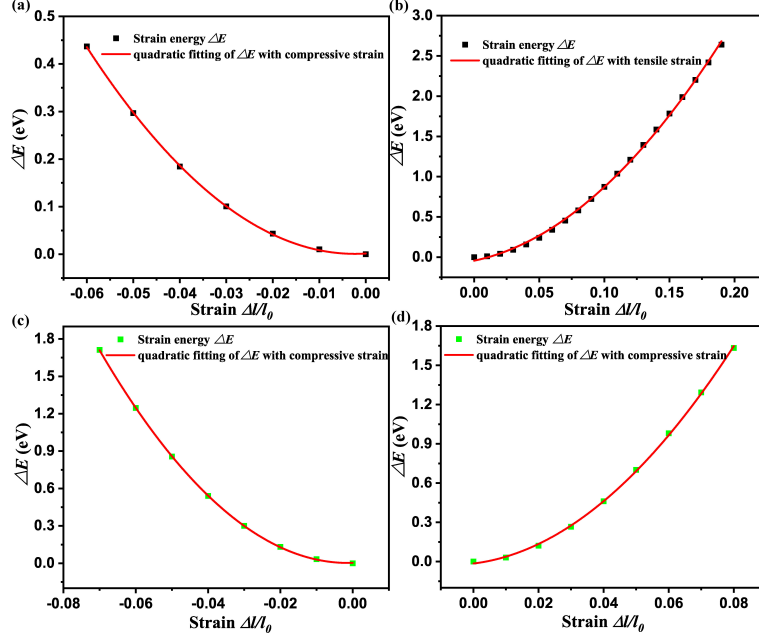

Figure S3. The relation of the strain energy  $\Delta E$  and the biaxial strain for  $\text{SnP}_3$  monolayer (a), (b) and bilayer (c), (d), respectively.

the corresponding elastic range, as shown in Fig. S3.

- 
- [1] H. Şahin, S. Cahangirov, M. Topsakal, E. Bekaroglu, E. Akturk, R. T. Senger, and S. Ciraci, Physical Review B **80**, 155453 (2009).
  - [2] R. Qin, C.-H. Wang, W. Zhu, and Y. Zhang, Aip Advances **2**, 022159 (2012).
